# Supplementary material
Source: publisher figshare collection journal article supplement (https://springernature.figshare.com/articles/dataset/_/9109244)
Supplement: Supplementary file [file 16612259]

## Additional file 1

### Benchmarking of alignment-free sequence comparison methods

Andrzej Zielezinski, Hani Z. Girgis, Guillaume Bernard, Chris-Andre Leimeister, Kujin Tang, Thomas Dencker, Anna K. Lau, Sophie Röhling, JaeJin Choi, Michael S. Waterman, Matteo Comin, Sung-Hou Kim, Susana Vinga, Jonas S. Almeida, Cheong Xin Chan, Benjamin T. James, Fengzhu Sun, Burkhard Morgenstern, Wojciech M. Karlowski

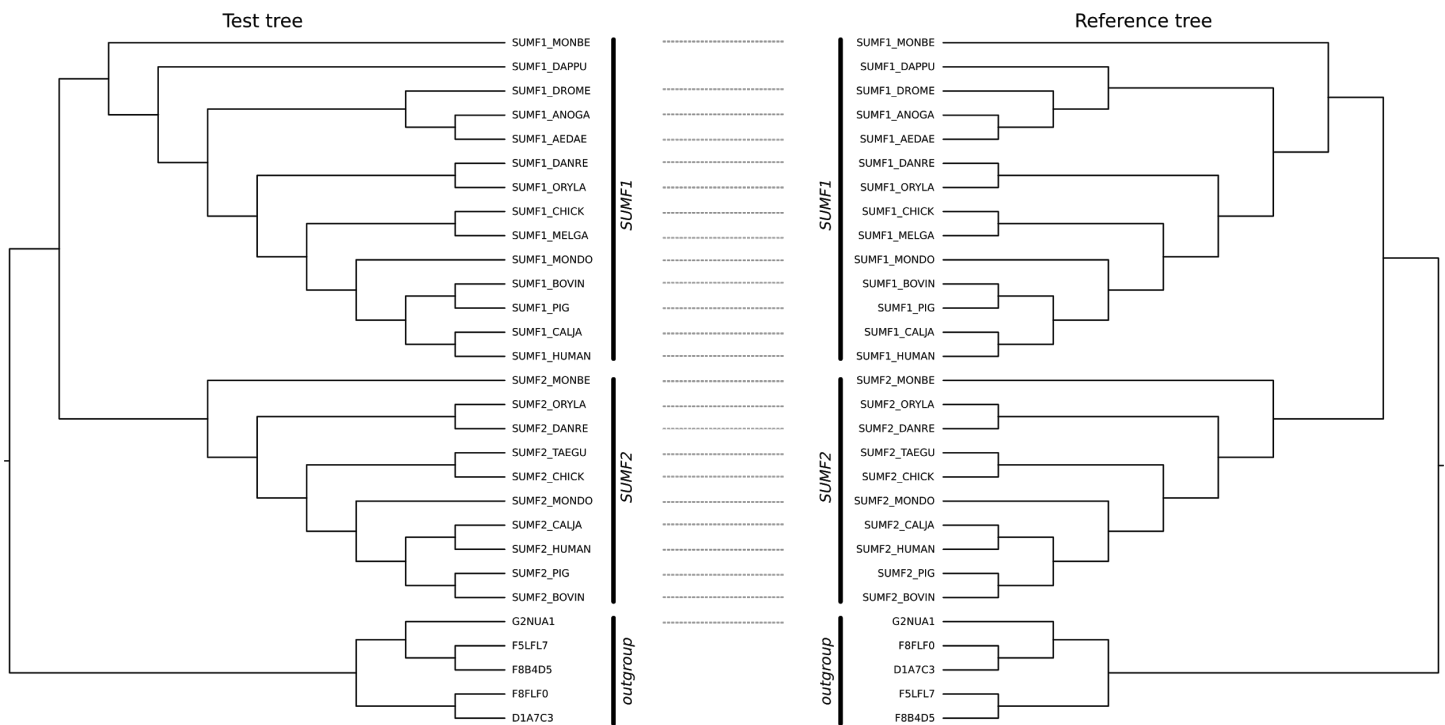

**Figure S1.** Comparison (tanglement) of test tree and reference tree of sulfatase modifying factor (SUMF) gene family in Eukaryotes. The test tree is inferred by 4 alignment-free measures in AFKS program (mismatch, markov, re\_k\_r, kl\_conditional). Reference phylogenetic tree was taken from SwissTree.

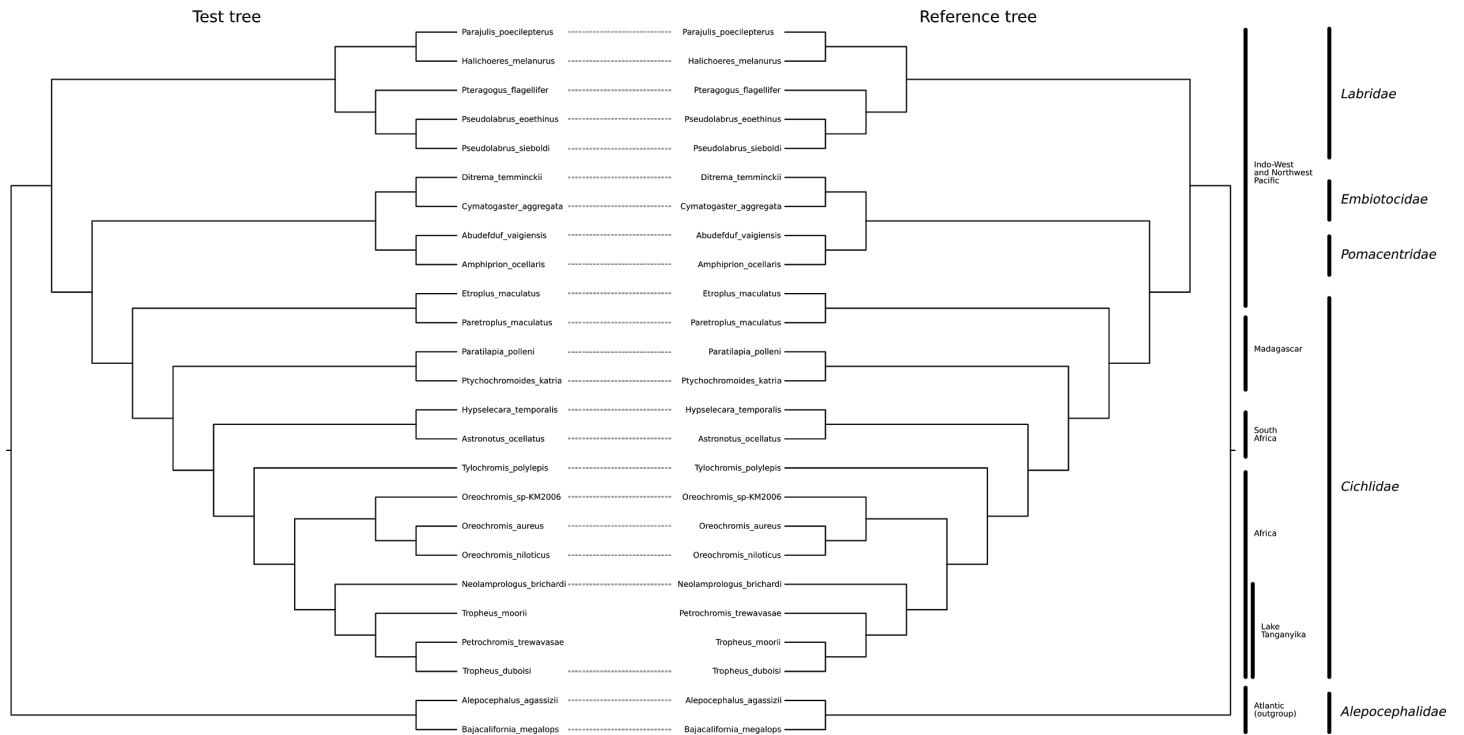

**Figure S2.** Comparison (tanglement) of test tree and reference tree of complete mitochondrial genomes from 25 labroid fishes. The test tree is inferred by 9 alignment-free programs (AFKS, alphy, CAFE, FSWM, jD2Stat, kmacs, msh, RTD-Phylogeny and spaced). Reference phylogenetic tree was taken from [1].

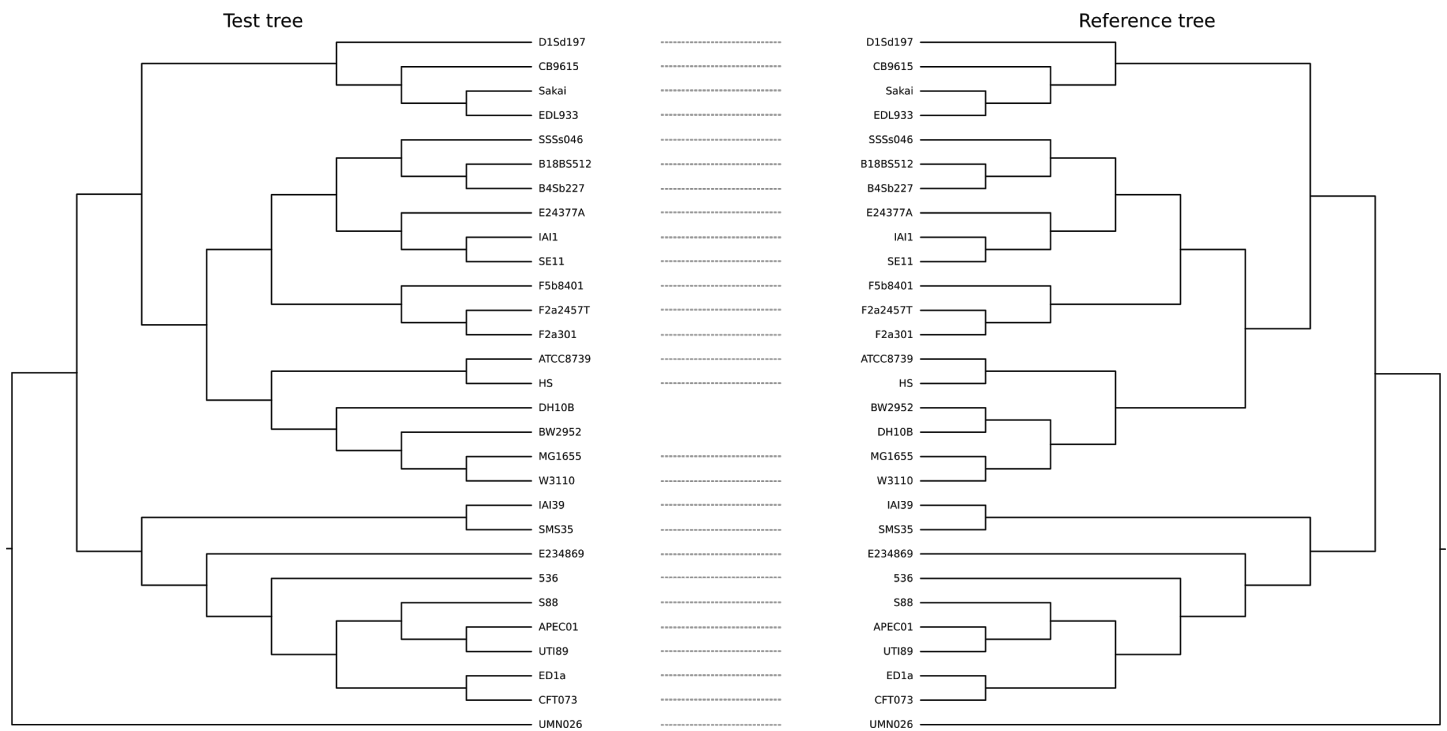

**Figure S3.** Comparison (tanglement) of test and reference cladograms of complete genomes from 29 *E. coli* / *Shigella* species. Test tree was inferred by Phylonium.

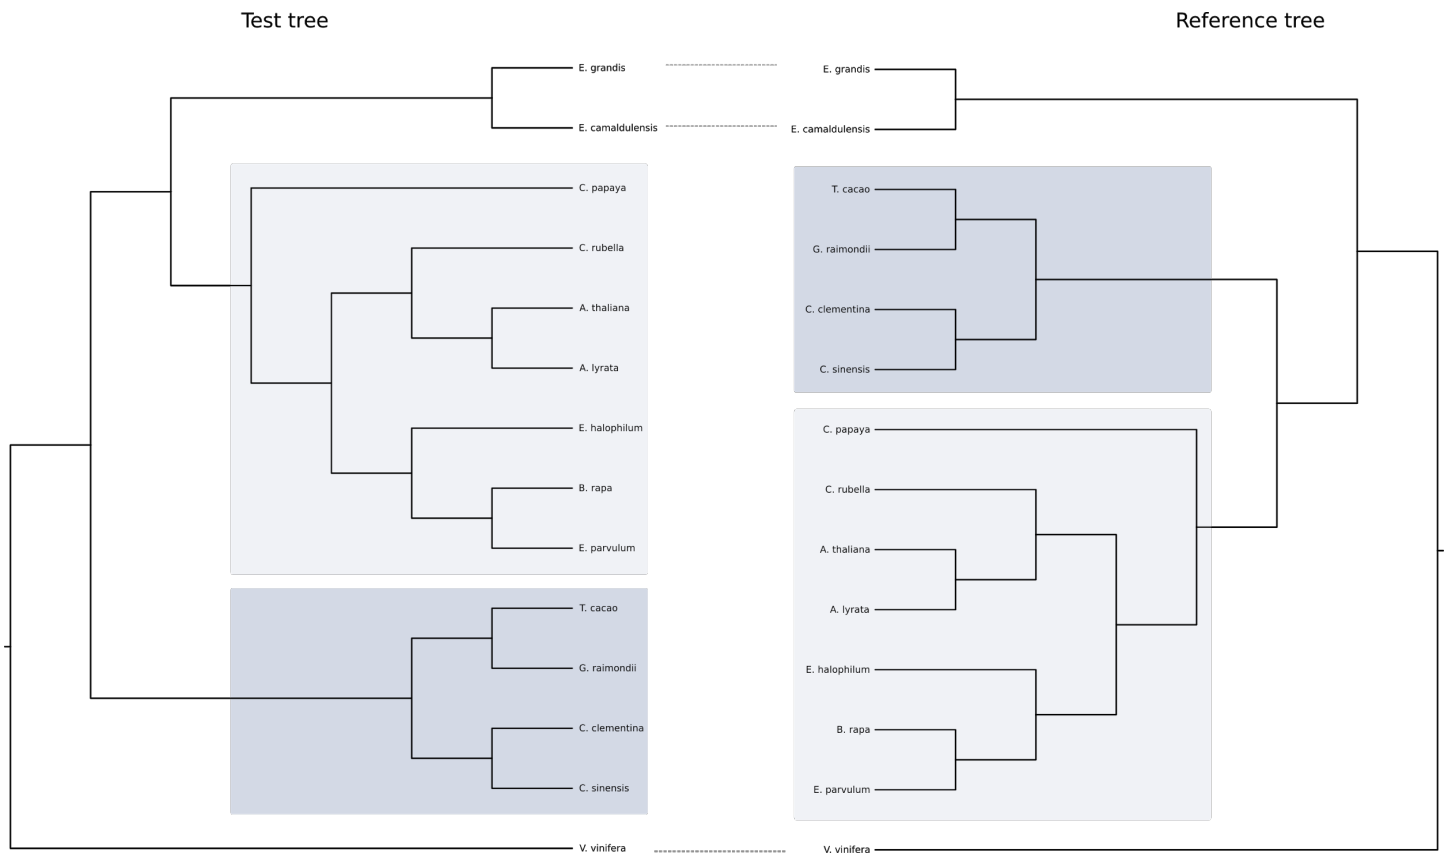

**Figure S4.** Comparison (tangement) of test and reference cladograms of complete genomes from 14 plant species. Test tree was inferred by Co-Phylog.

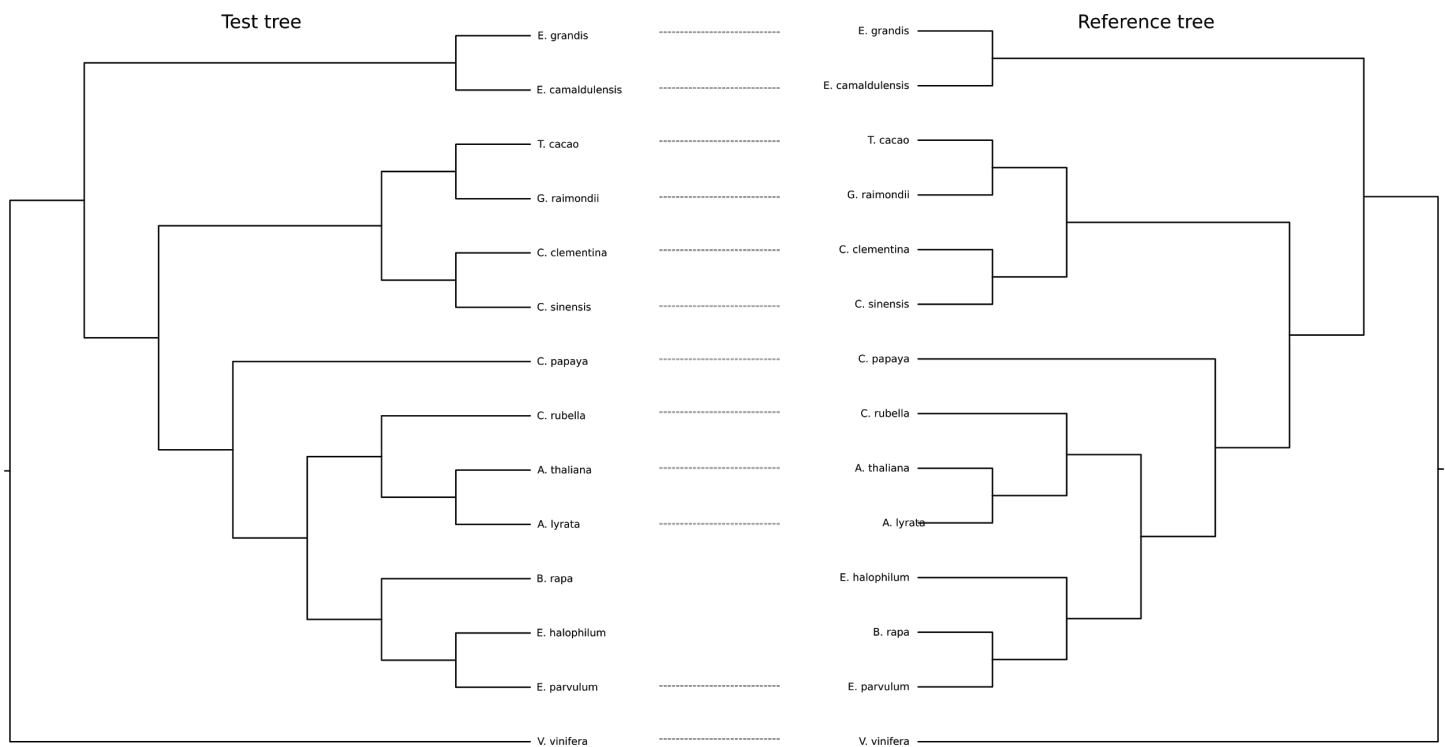

**Figure S5.** Comparison (tangement) of test and reference cladograms of complete genomes from 14 plant species. Test tree was inferred by mash.

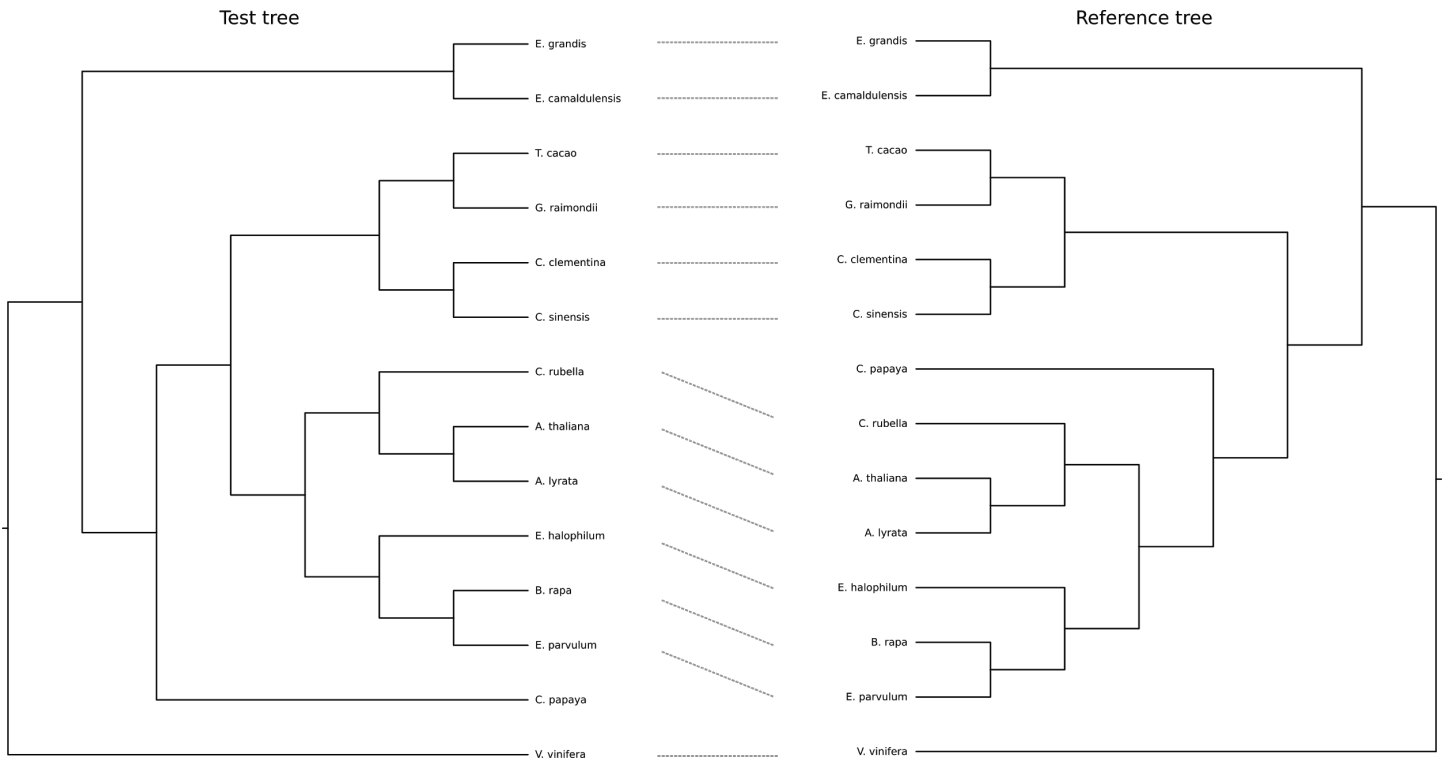

**Figure S6.** Comparison (tanglement) of test and reference cladograms of complete genomes from 14 plant species. Test tree was inferred by Multi-SpaM.

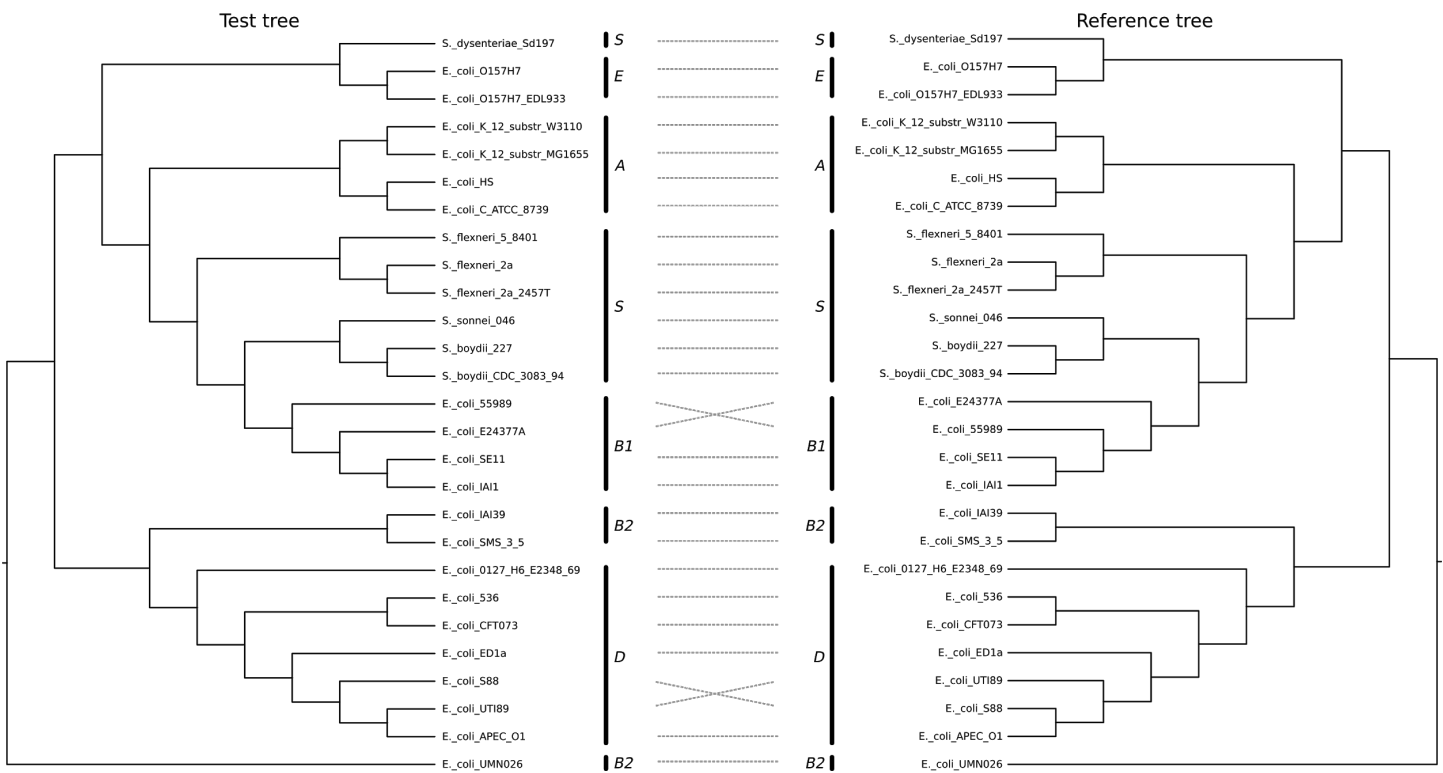

**Figure S7.** Comparison (tanglement) of test and reference cladograms of complete genomes from 27 *E. coli* and *Shigella* species. Test tree was inferred by andi and co-phylog. Reference phylogenetic tree was constructed in [2–4] from 5282 Bayesian protein trees. *E. coli* reference groups and *Shigella* (S) are indicated.

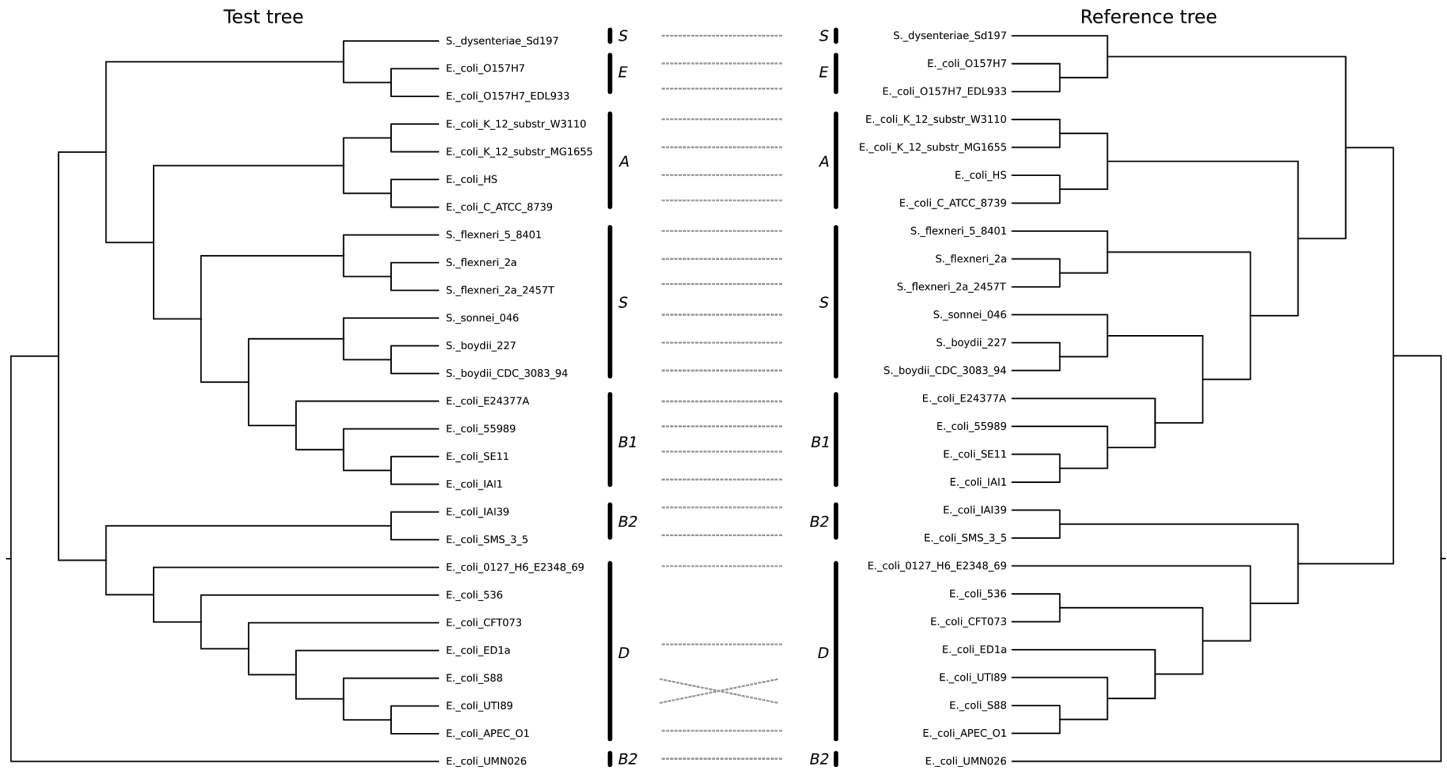

**Figure S8.** Comparison (tangement) of test and reference cladograms of complete genomes from 27 *E. coli* and *Shigella* species. Test tree was inferred by phylonium. Reference phylogenetic tree was constructed in [2–4] from 5282 Bayesian protein trees. *E. coli* reference groups and *Shigella* (S) are indicated.

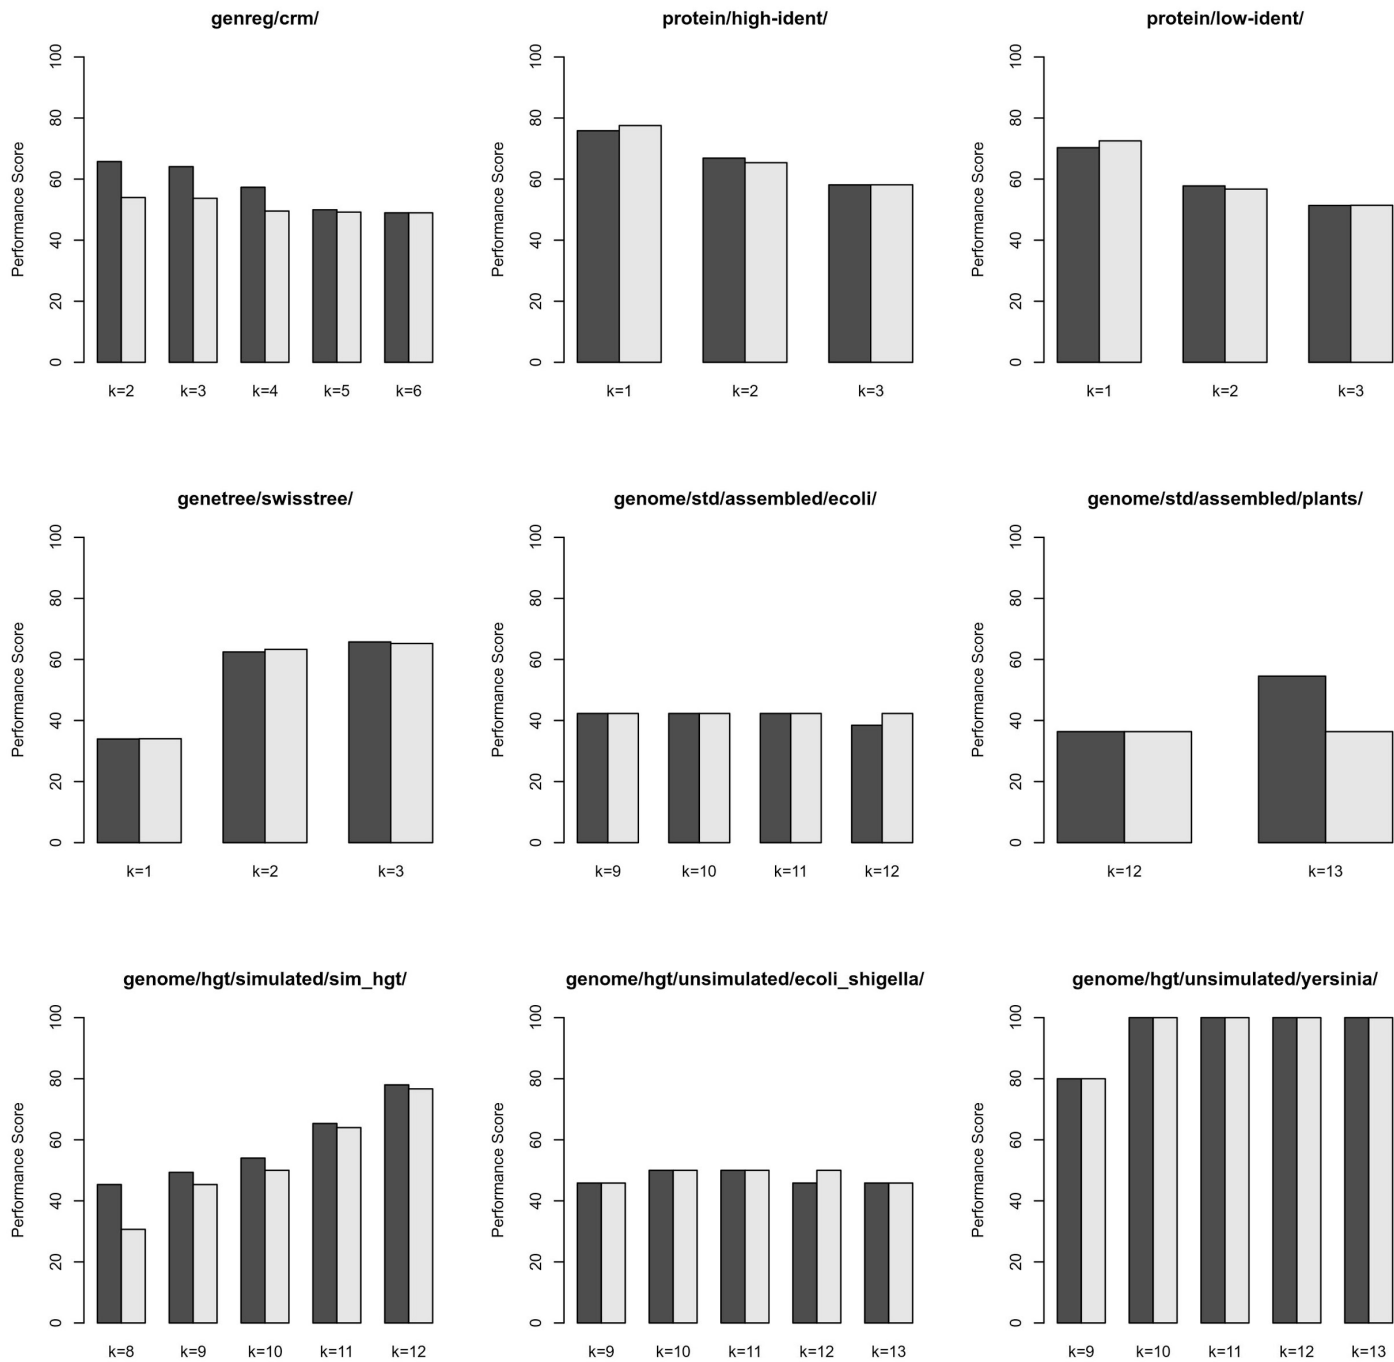

**Figure S9.** Performance scores obtained by alfpy--canberra (dark grey) and AFKS-canberra (light grey) run on common word lengths across datasets.

## References

1. Fischer C, Koblmüller S, Güllly C, Schlötterer C, Sturmbauer C, Thallinger GG. Complete mitochondrial DNA sequences of the threadfin cichlid (*Petrochromis trewavasae*) and the blunthead cichlid (*Tropheus moorii*) and patterns of mitochondrial genome evolution in cichlid fishes. *PLoS One*. 2013;8:e67048.
2. Skippington E, Ragan MA. Within-species lateral genetic transfer and the evolution of transcriptional regulation in *Escherichia coli* and *Shigella*. *BMC Genomics*. 2011;12:532.
3. Beiko RG, Harlow TJ, Ragan MA. Highways of gene sharing in prokaryotes. *Proc Natl Acad Sci U S A*. 2005;102:14332–7.
4. Bernard G, Chan CX, Ragan MA. Alignment-free microbial phylogenomics under scenarios of sequence divergence, genome rearrangement and lateral genetic transfer. *Sci Rep*. 2016;6:28970.
